# Supplementary material
Source: MDPI journal article supplement (https://www.mdpi.com/2079-6439/11/2/16)
Supplement: s1 [file s1]

Archive with 1 entries (1 files):
- fibers-2125179-supplementary.pdf
