# Supplementary material
Source: MDPI journal article supplement (https://www.mdpi.com/2079-6439/11/2/16)
Supplement: s1 [file s1 › fibers-2125179-supplementary.pdf]

## Supplementary Files

# Effect of Cross-Linkers on the Processing of Lignin/Polyamide Precursors for Carbon Fibres

Baljinder K. Kandola, Trishan A. M. Hewage, Muhammed Hajee and A. Richard Horrocks

Institute for Materials Research and Innovation, University of Bolton, Bolton BL3 5AB, UK

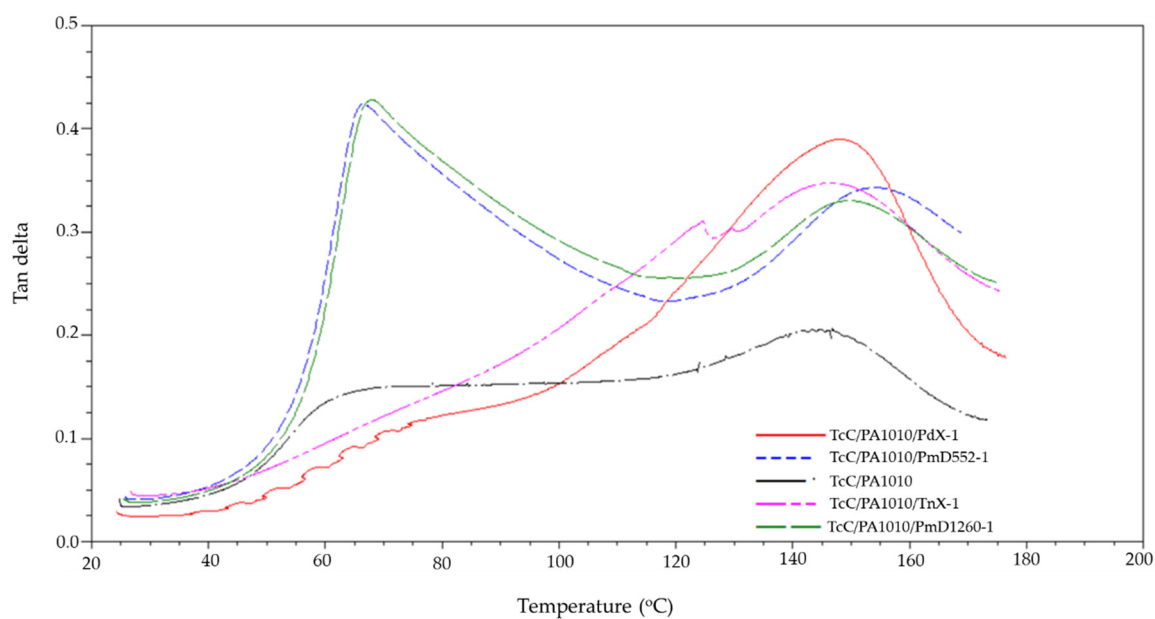

**Figure S1.** DMA analysis of TcC/PA1010 and TcC/PA1010 blends containing PdX, TnX, PmD 552 and PmD 1260 cross-linkers.

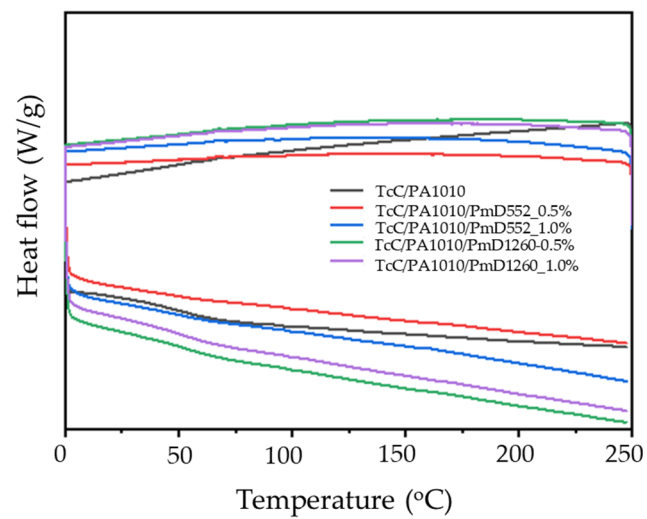

**Figure S2.** DSC curves of thermally stabilised TcC/PA1010 filaments, pre-impregnated with Primid 552 and Primid 1260.

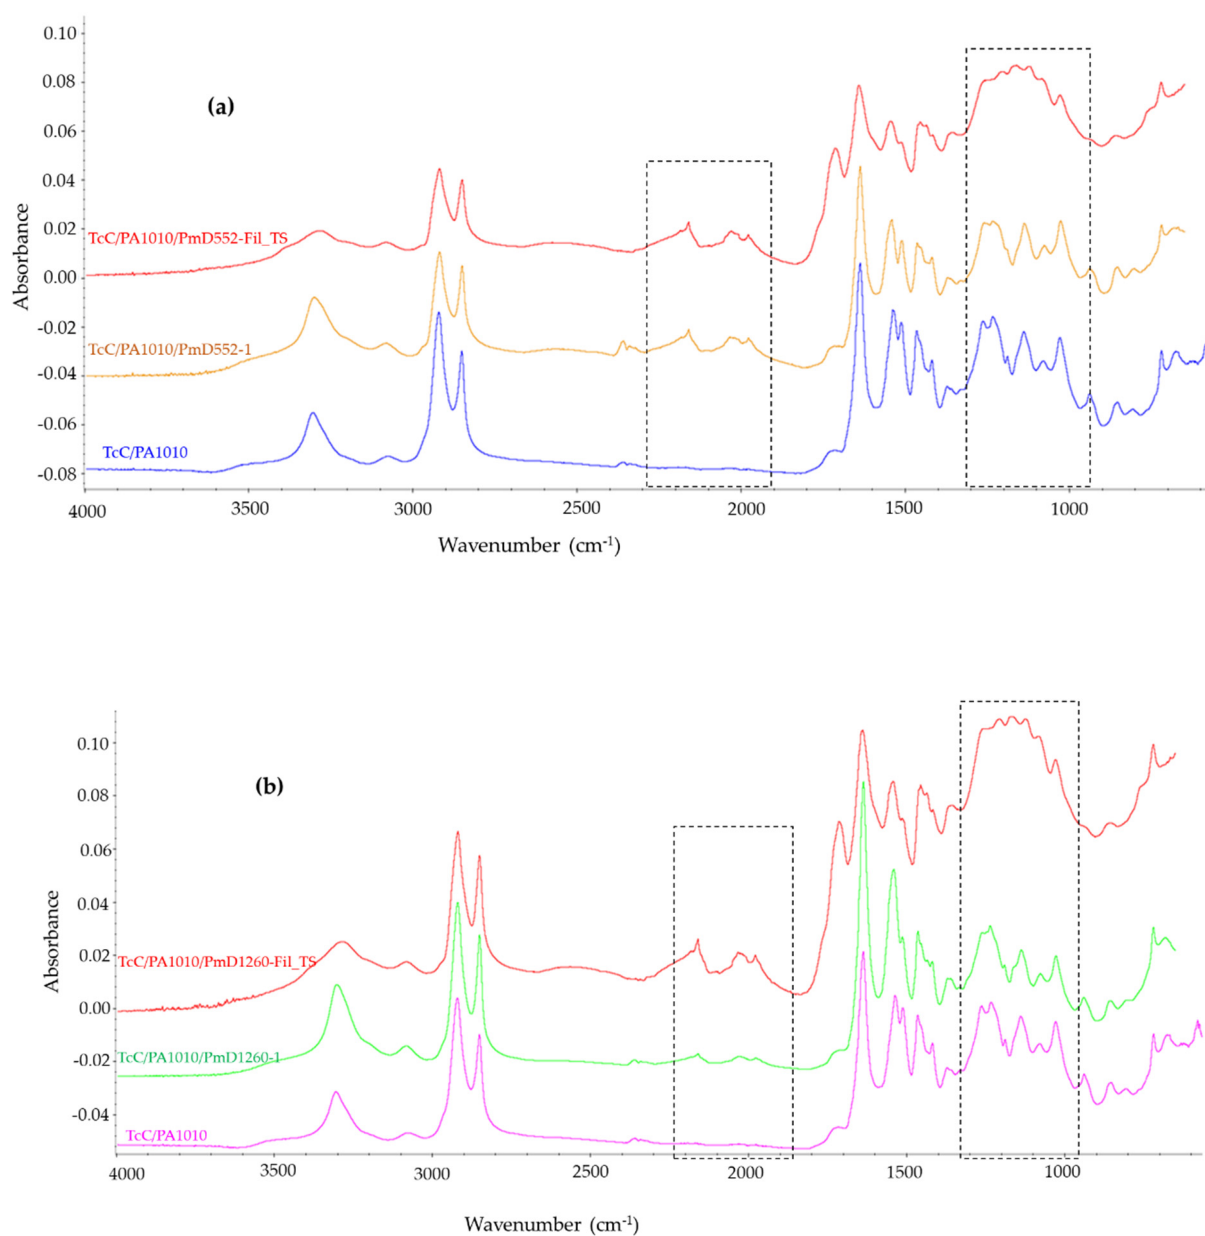

**Figure S3.** FTIR spectra of melt compounded TcC/PA1010 and TcC/PA1010 blends containing both Primid cross-linkers and thermally stabilised filaments of TcC/PA1010/Pmds (produced by pre-treatment): (a) Pmd552 and (b) Pmd 1260
